# Supplementary material for: Enhancing molecule fluorescence with asymmetrical plasmonic antennas
Source: Royal Society of Chemistry journal article supplement (doi:10.1039/c3nr01306e), 2013-01-01
Supplement: c3nr01306e.pdf [file c3nr01306e.pdf]

## Supporting information

# Enhancing molecule fluorescence with asymmetrical plasmonic antenna

Guowei Lu,<sup>1,\*</sup> Jie Liu,<sup>1</sup> Tianyue Zhang,<sup>1</sup> Hongming Shen,<sup>1</sup> Pascal Perriat,<sup>2</sup> Matteo Martini,<sup>3</sup> Olivier Tillement,<sup>3</sup> Ying Gu,<sup>1</sup> Yingbo He,<sup>1</sup> Yuwei Wang,<sup>1</sup> and Qihuang Gong<sup>1,\*</sup>

1. State Key Laboratory for Mesoscopic Physics, Department of Physics, Peking University, Beijing 100871, China

2. MATEIS, UMR 5510 CNRS, INSA-Lyon, Université de Lyon, 20 av. Albert Einstein, 69621 Villeurbanne Cedex, France

3. LPCML, Université de Lyon, Université Claude Bernard, 43 Bd du 11 novembre 1918, 69622 Villeurbanne Cedex, France

E-mail: guowei.lu@pku.edu.cn; qhgong@pku.edu.cn

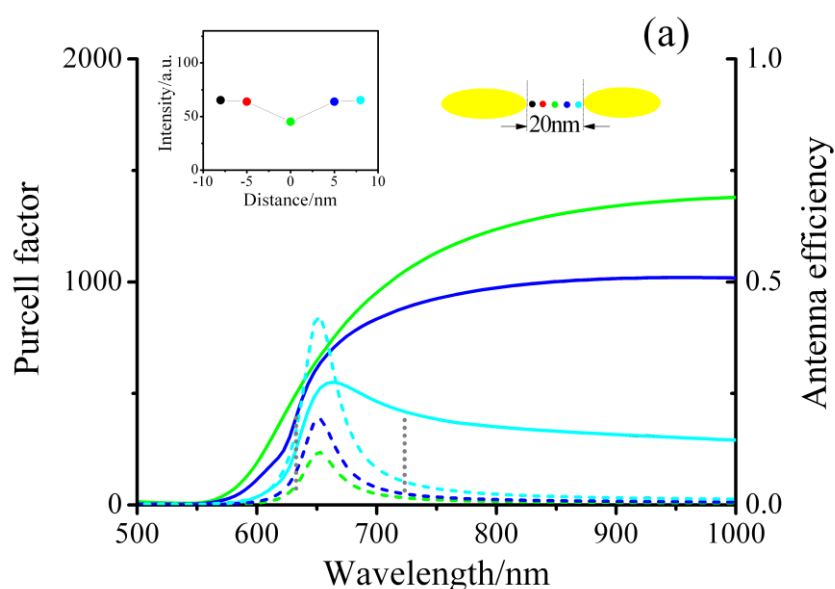

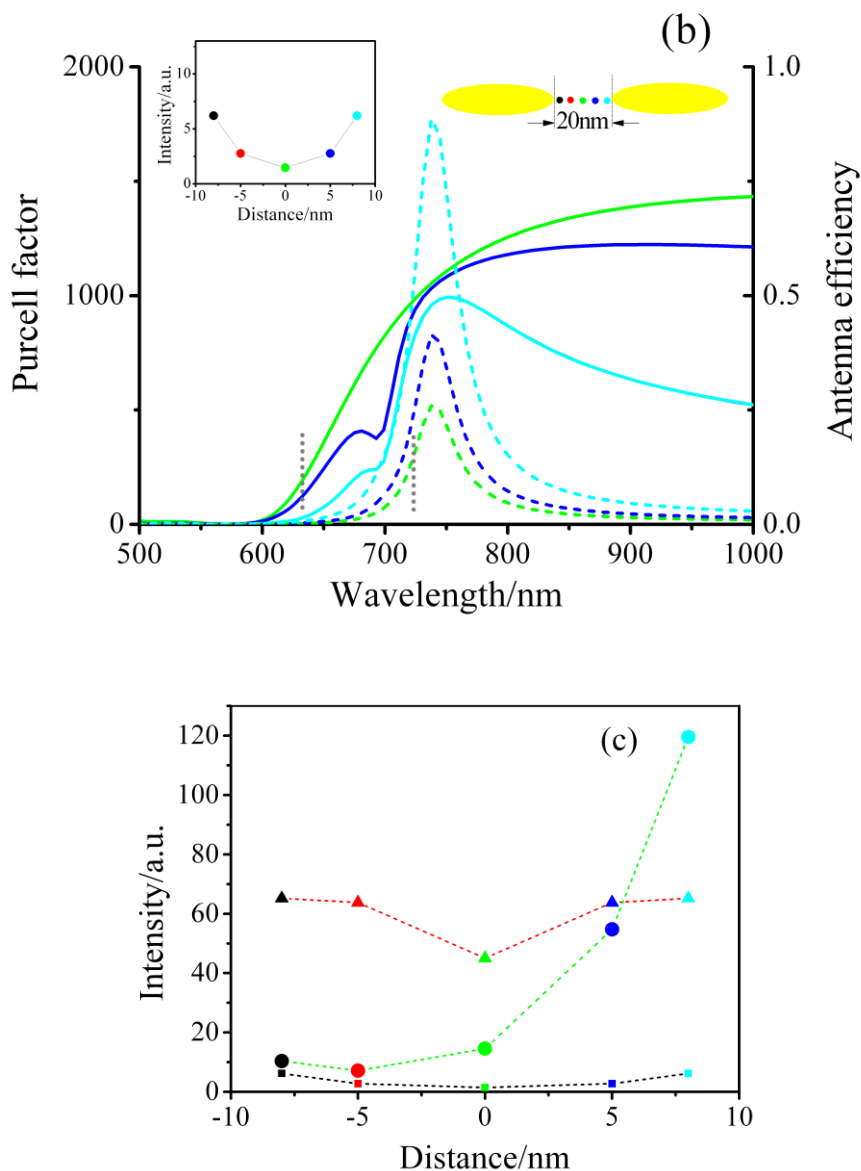

Figure S1. Antenna efficiency  $\eta_a$  (solid line) and the normalized Purcell factor  $F$  (dash curves) as a function of wavelength. An emitter is placed within the gap of symmetrical antennas, i.e. Rods-L45-L45 (a) and Rods-L60-L60 (b) at different emitter-antenna separations of 2 nm, 5 nm and 10 nm respectively. The inserts show the corresponding relative fluorescence intensities, i.e.  $S/S_0 \propto F_{(\omega)} \cdot \eta_{a(\omega)}$ , at different distances. The gray straight lines indicate the wavelength of excitation and emission as above. (c) for comparison, the corresponding relative fluorescence intensities within the gap for three antennas are plotted together as a function of emitter-antenna separation.

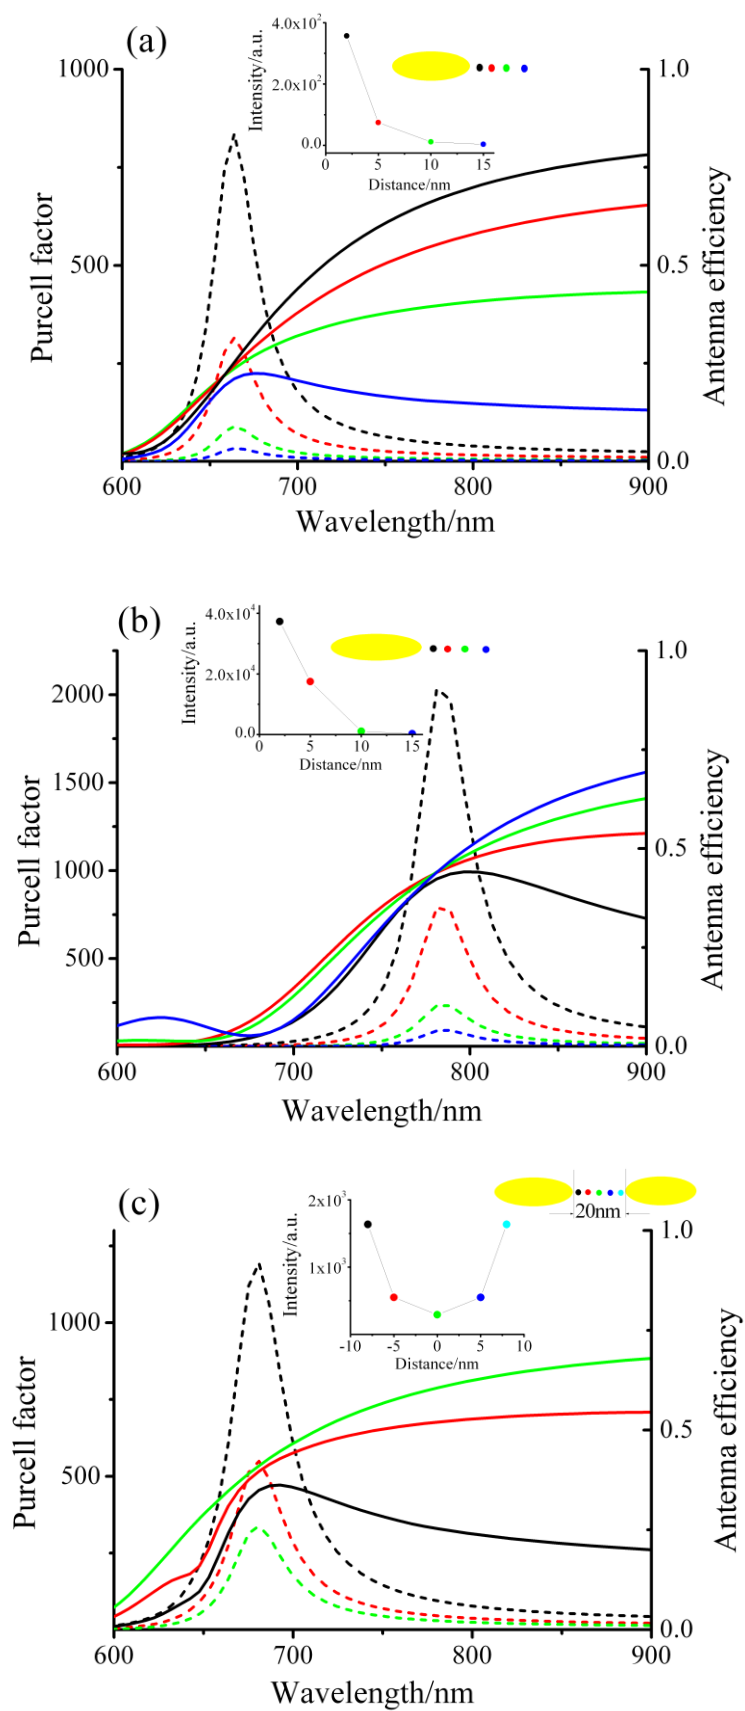

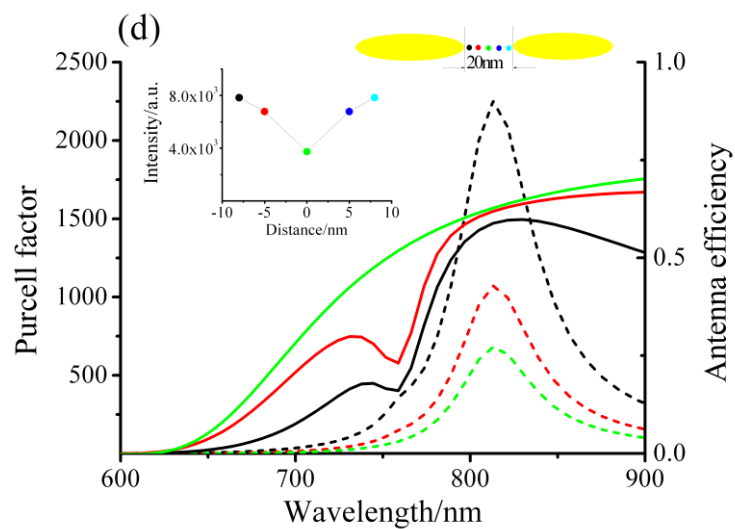

Figure S2. Antenna efficiency  $\eta_a$  (solid line) and the normalized Purcell factor  $F$  (dash curves) as a function of wavelength at different positions. An emitter is coupled either to the single gold nanorod Rod-L50 (a) or to the Rod-L72 (b) with different emitter-antenna separations of 2 nm, 5 nm, 10 nm and 15 nm. And an emitter is placed within the gap of symmetrical antennas, i.e. Rods-L50-L50 (c) and Rods-L72-L72 (d) at different emitter-antenna separations of 2 nm, 5 nm and 10 nm respectively.
